# Supplementary material for: Flexible metal oxide thin-film transistors produced by a nanofiber-to-film process
Source: Royal Society of Chemistry journal article supplement (doi:10.1039/d4tc01779j), 2024-01-01
Supplement: d4tc01779j1.pdf [file d4tc01779j1.pdf]

## Supplementary Material

# Flexible Metal Oxide Thin-Film Transistors Produced by Nanofiber-to-Film Process

*Danna Zhang<sup>a,b,1</sup>, Guangtan Miao<sup>a,b,1</sup>, Guoxia Liu<sup>a,b,2</sup>, and Fukai Shan<sup>a,b,2</sup>*

<sup>a</sup>College of Physics, Qingdao University, Qingdao 266071, China

<sup>b</sup>College of Microtechnology & Nanotechnology, Qingdao University, Qingdao 266071, China

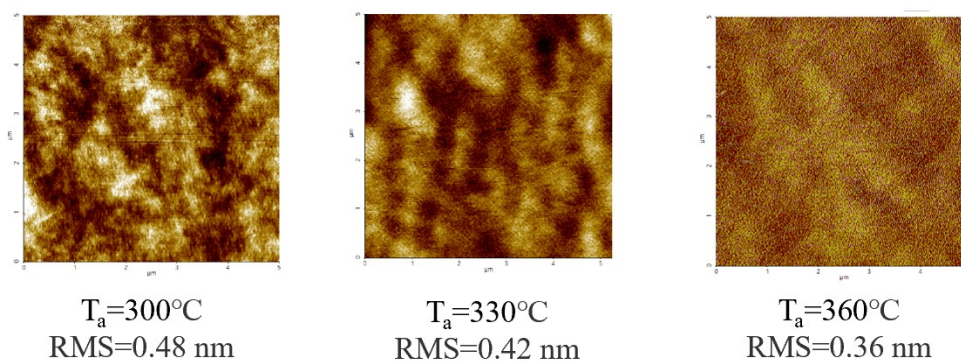

**Fig. S1** AFM images of  $\text{In}_2\text{O}_3$  thin-films annealed at various temperatures.

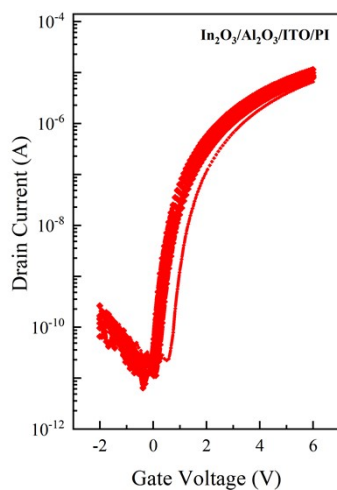

**Fig. S2** Transfer curves of flexible  $\text{In}_2\text{O}_3/\text{Al}_2\text{O}_3$  TFT array ( $4\times 5$ ).

<sup>1</sup> Danna Zhang and Guangtan Miao contributed equally to this work.

<sup>2</sup> Corresponding author: Guoxia Liu ([gxliu@qdu.edu.cn](mailto:gxliu@qdu.edu.cn)), Fukai Shan ([fkshan@qdu.edu.cn](mailto:fkshan@qdu.edu.cn))

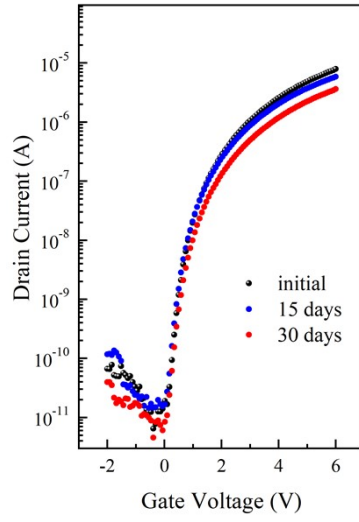

**Fig. S3** Transfer curves of flexible  $\text{In}_2\text{O}_3/\text{Al}_2\text{O}_3$  TFT after 30 days with aging.

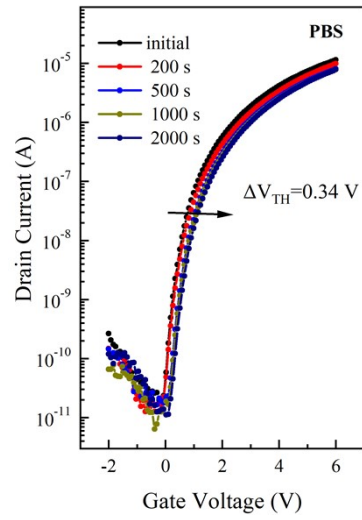

**Fig. S4** PBS tests ( $V_{\text{GS}} = 3 \text{ V}$ ) for flexible  $\text{In}_2\text{O}_3/\text{Al}_2\text{O}_3$  TFTs.
